1     **Development of RNA-based assay for rapid detection of SARS-CoV-2 in clinical samples**

2  
3     <sup>1#</sup> Vinod Kumar, <sup>1#</sup> Suman Mishra, <sup>1#</sup> Rajni Sharma, <sup>2</sup> Jyotsna Agarwal, <sup>3</sup> Ujjala Ghoshal, <sup>4</sup> Tripti Khanna,  
4                     <sup>1</sup> Lokendra K. Sharma, <sup>1</sup> Santosh Kumar Verma and <sup>1\*</sup> Swasti Tiwari

5  
6     <sup>1</sup> Department of Molecular Medicine & Biotechnology, SGPGIMS, Raibareli Road, Lucknow -  
7     226014, India; <sup>2</sup> Department of Microbiology, Dr. Ram Manohar Lohia Institute of Medical  
8     Sciences, Lucknow, 226010; <sup>3</sup> Department of Microbiology, Virology and COVID19 Lab,  
9     SGPGIMS, Raibareli Road, Lucknow -226014, India; <sup>4</sup> Indian Council of Medical Research,  
10    Ramalingaswami Bhawan, New Delhi, India

11  
12    # Equal authorship

13    **\*Corresponding author**

14    Prof. Swasti Tiwari,  
15    Department of Molecular Medicine & Biotechnology  
16    4th Floor PMSSY Building  
17    Sanjay Gandhi Post Graduate Institute of Medical Science (SGPGIMS)  
18    Raebareli Rd, Lucknow, Uttar Pradesh 226014, India  
19    Email Address: [tiwaris@sgpgi.ac.in](mailto:tiwaris@sgpgi.ac.in)

20  
21  
22    **Disclosure:** A patent application has been filed (ref#202011018132) on subject matter  
23    described in the publication.

24

25

26 **Abstract:**

27 The ongoing spread of pandemic coronavirus disease (COVID-19) is caused by Severe Acute  
28 Respiratory Syndrome coronavirus 2 (SARS-CoV-2). In the lack of specific drugs or vaccines for  
29 SARS-CoV-2, it demands rapid diagnosis and management for controlling the outbreak in the  
30 community. Here we report the development of the first rapid-colorimetric assay capable of  
31 detecting SARS-CoV-2 in the human nasopharyngeal RNA sample in less than 30 minutes. We  
32 utilized a nanomaterial-based optical sensing platform to detect RNA-dependent RNA  
33 polymerase (*RdRp*) gene of SARS-CoV-2, where the formation of oligo probe-target hybrid led  
34 to salt-induced aggregation and changes in gold-colloid color from pink to blue in visible range.  
35 Accordingly, we found a change in colloid color from pink to blue in assay containing  
36 nasopharyngeal RNA sample from the subject with clinically diagnosed COVID-19 (n=7). The  
37 colloid retained pink color when the test includes samples from COVID-19 negative subjects  
38 (n=6) or human papillomavirus (HPV) infected women (n=2). The optimized method has  
39 detection limit as little as 0.5 ng of SARS-CoV-2 RNA. Overall, the developed assay rapidly  
40 detects SARS-CoV-2 RNA in clinical samples in a cost-effective manner and would be useful in  
41 pandemic management by facilitating mass screening.

42

43 **Key words**

44 COVID-19, diagnosis, Ribonucleic acid, Coronavirus disease, colorimetric test

45

46 **Introduction**

47 Coronavirus disease is rapidly spreading across the world and raising severe global health  
48 concerns. In December 2019, China reported the first disease case in its Hubei Province. Based  
49 on the phylogenetic analysis, the identified novel coronavirus is named as Severe Acute  
50 Respiratory Syndrome Coronavirus 2 (SARS-CoV-2), and the disease spread by SARS-CoV-2  
51 is known as “COVID-19”, declared as a pandemic by World Health Organization (WHO).(1)  
52 Despite global massive efforts to control the outbreak of COVID-19, this pandemic is still on the  
53 rise. To date, lack of approved medicine or vaccine impede escalated the management of the  
54 COVID-19 epidemic. In the absence of an effective treatment strategy, developing affordable  
55 screening for rapid diagnosis is critically required in the management of COVID-19.(2) According  
56 to the WHO, the immediate priority is the development of point-of-care tests for the detection of  
57 SARS-CoV-2 at an early stage with improved sensitivity.(3)

58 Currently, the COVID-19 diagnostic test falls into two categories: antibody and nucleic acid-  
59 based detection systems. The Developed immunoassay is rapid but inefficient for the detection  
60 of the pathogen at an early stage of infection.(2) Besides, WHO does not currently recommend  
61 the use of antigen-based rapid diagnostic tests for patient care, but encourages the related  
62 research to improve their performance and potential diagnostic utility.(4)

63 Among the nucleic acid-based detection systems, the WHO considered a Real-time polymerase  
64 chain reaction (RT-PCR) based method as a gold standard for COVID-19 testing.(4) The  
65 sample-to-result time of the quantitative RT-PCR (qRT-PCR) was initially >4 hrs; however,  
66 constant efforts are underway to improve the turn-around time through automation. Besides,  
67 time-consuming process PCR based tests are expensive; they require sophisticated instruments  
68 and expertise.(2) Thus, other technologies, such as reverse transcription- loop-mediated  
69 isothermal amplification (RT-LAMP) (5) and Genome-editing (6), are being explored. These are

70 promising technologies; however, the expected turn-around time would still be around 1 hour  
71 and may not be economical for mass screening, especially for the developing countries.

72 Nanomaterials based sensing platforms hold promise to develop rapid disease diagnostics.  
73 However, their limited use in the clinical setting is due to the need for sophisticated  
74 equipment.(7, 8) A recent attempt to use antisense-nucleotide capped gold nanoparticles for N-  
75 gene based, COVID-19 detection could be a game changer.(9) Whereas, WHO suggested that  
76 N-gene has a relatively weak analytical capability, compared to the *RdRp* gene, to detect  
77 COVID-19 infection.(10) Moreover, the authors have demonstrated COVID-19 detection in a  
78 cellular-model system, and application in human samples has yet to be shown.

79 In this study, we report for the first time gold nanoparticles (AuNPs) based rapid colorimetric  
80 assay for visual eye detection of COVID-19 RNA in human samples designed to target *RdRp*  
81 specific gene target in very cost-effective manner with wide application of mass screening in  
82 field. We utilized the surface plasmon resonance property of AuNPs to detect unamplified  
83 COVID-19 RNA in human samples. The ability of AuNPs to preferentially adsorb ssRNA/ssDNA  
84 over dsDNA/dsRNA is the crucial concept of this assay. The single and double-stranded  
85 oligonucleotides have different electrostatic properties, which provide stability (via retaining  
86 natural color) and aggregation (which causes color change) of AuNPs in solution,  
87 respectively.(11)

## 88 **Materials and Methods**

89 **Chemicals:** Citrate buffer stabilized AuNPs (10 nm diameter) was purchased from Alfa Aesar  
90 (Thermo Fisher Scientific India Private Limited). Phosphate Buffer Saline (PBS pH 7.0) and  
91 NaCl were procured from Sigma Aldrich.

92 **Clinical samples:** Nasopharyngeal RNA sample from COVID- negative (n=6) and positive  
93 subjects (n=7) were used. The COVID-19 testing of these subjects were done in the Indian

94 Council of Medical Research (ICMR, India) approved diagnostic laboratory using Taqman-  
95 based RT-PCR kit (Labgun, lab, Genomics.co. Ltd, Republic of Korea). The study protocol to  
96 use clinical samples was approved by Institutional Human Ethics Committee SGPGIMS,  
97 Lucknow (Ref N. PGI/BE/327/2020). The cervical DNA samples from human papilloma virus  
98 (HPV) infected woman (n=2) was used as non-specific target control. The clinical Samples  
99 (cervical smear) for the HPV DNA test were processed using HPV Test Hybrid Capture® 2  
100 protocol (QIAGEN). Samples with relative light units (RLU) /Cutoff Value ratios > 1.0 were  
101 considered as HPV positive and < 1.0 were considered as HPV negative. Only HPV positive  
102 DNA samples were used during validation experiments.

103 ***In Vitro transcription (IVT) of SARS-CoV-2 RNA:*** The RNA (5ng) from confirmed COVID-19  
104 positive human sample were first reverse transcribed with modified oligo dT primer having a T7  
105 promoter sequence at its 5' end, and the resulting single stranded cDNA was further *In-vitro*  
106 transcribed (IVT) using HiScribe T7 Quick High Yield RNA Synthesis Kit according to the  
107 manufacturer's protocol (New England BioLabs Inc, NEB #E2050). The amplified RNA was than  
108 purified using Monarch RNA Cleanup Kit (New England BioLabs Inc.) and quantified by RNA  
109 HS reagent using Qubit system (Thermo Fisher Scientific).

110 ***Colorimetric assay for the detection of SARS-CoV-2 RNA:*** For colorimetric assay, reaction  
111 was set up in 10 µL of reaction volume in sterile PCR tubes, containing (a) hybridization buffer  
112 containing 80mM NaCl), (b) 0.5 µM oligo probe for *RdRp* genes, and (c) target RNA from  
113 positive patients or IVT RNA. The *RdRp* oligo probe (5'-GTGATATGGTCATGTGTGGCGG-3')  
114 was used to specifically detect the presence of SARS-CoV-2 RNA in the assay. In parallel, to  
115 measure the specificity of the assay, input genomes from different source such nasopharyngeal  
116 RNA from COVID negative subjects and HPV DNA from cervical cancer positive samples were  
117 used as negative controls. Similarly, non-template control (NTC) was also included to measure  
118 the background reactivity. In addition, to confirm the working principle of the assay, a different

119 RNA template (isolated from pancreas) and pancreas specific *REG-3* (Regenerating islet-  
120 derived protein 3) gene oligo probe (5'- GTGCCTATGGCTCCTATTGCT-3') were used  
121 separately.

122 The final reaction mixture with above combinations was then denatured at 95°C for 30  
123 seconds, annealed at 60°C for 60 seconds and then cooled to room temperature for 10 minutes.  
124 Subsequently, 10 nM colloidal AuNPs (~10 nm) were added to the assay mixture and allowed to  
125 develop color for 1-2 minute.

126 ***Spectral studies and measurement of sensitivity:*** Absorption spectrum of the assay mixture  
127 was recorded in the range of 300 -700 nm. The peak shift from 520 nm (known as red-shift) and  
128 peak broadening after 520 nm were measured as a characteristic feature of the salt induced  
129 aggregation. Using various combinations of positive and negative controls (as discussed in the  
130 previous section) the specificity of reaction and aggregation were compared. Assay sensitivity  
131 was determined by serially diluting the input SARS-CoV-2 RNA from both the IVT synthesized  
132 and, synthetic SARS-CoV-2 control (nCov19 control kit by Applied Biosystems) ranging from 5-  
133 0.1ng and 1-0.1ng concentrations respectively.

134

## 135 **Result and discussion**

136 In this study, we report for the first time the development of a rapid and affordable RNA-based  
137 assay for the visual detection of the SARS-CoV-2 genome in human samples. In this assay, we  
138 use surface plasmon resonance property of gold nanoparticles/colloids (AuNP) and targeted the  
139 *RdRp* specific gene sequence of SARS-CoV-2. *RdRp* is essential for viral replication and has  
140 higher analytical power than E (envelope protein) and N (nucleocapsid protein) genes of SARS-  
141 CoV-2. (10) our current established assay, salt-induced aggregation and color change of the  
142 gold colloids occurs after *RdRp* oligo probe hybridizes with its specific target RNA of SARS-

143 CoV-2. With the current escalated demand of cost effective, easy and sensitive diagnostic for  
144 COVID-19, the test was developed using commercially available nCoV19 synthetic DNA and  
145 validated further using clinical samples from COVID-19 subjects (as confirmed using Taqman  
146 based RT-PCR method, Table S1). In our study, we demonstrated a visual change in gold  
147 colloid color from pink to blue when RNA samples from subjects with clinically diagnosed  
148 COVID-19 infection hybridize with *RdRp* oligo probe (n=7). Simultaneously, the color remained  
149 pink in SARS-CoV-2 negative samples due to the absence of hybridization (n=6).

150 Figure 1 illustrates the sequential schematics of process of the developed test. The color of the  
151 gold colloid solution is dependent on the aggregation property of AuNPs in suspension.(12, 13)  
152 The aggregation-induced color change can be visually monitored (by the naked eye) and  
153 quantitated through absorption spectroscopy. Generally, in aqueous solution, gold colloids  
154 remain stabilized by the coating of negatively charged citrate ions (14) and have visible  
155 appearance of pink color (Figure 1). In solution, individual particle exhibits a surface plasmon  
156 resonance peak ( $\lambda_{max}$ ) at 520 nm (Figure 2a, Green curve). The oligonucleotide probe  
157 preferentially adsorbs on AuNPs and provides additional stability due to the addition of negative  
158 charges.(15) The same phenomenon was observed in our experiments when *RdRp* oligo probe  
159 adsorbed and protected the salt-induced aggregation of colloid in the absence of target RNA  
160 (NTC) (Figure 2a, Grey curve). Except for the reduced intensity of the absorption spectrum,  
161 which was due to dilution of the colloid (Figure 2a, Grey curve), NTC and AuNP assays showed  
162 no change? A pure colloid is pink in color (Inset of Figure 2a left vial), which turns into light pink  
163 when it reacts with hybridization buffer containing oligo probe in equal volume (without target)  
164 (Inset of Figure 2a right vial). Unlike dsDNA, inherent structural flexibility of ssDNA/RNA to  
165 partially uncoil its bases, exposing them to AuNPs, generates the attractive electrostatic forces  
166 causing them to allow over colloids and giving protection against electrostatic interaction  
167 causing salt-induced aggregation.(15)

168 In this assay, SARS-CoV-2 RNA from human patients or IVT synthesized RNA was added into  
169 hybridization buffer (containing oligo probe), followed by denaturation and annealing at 95°C  
170 (30s) and 60°C (60s), respectively. After cooling at room temperature, the gold colloid was  
171 added into the above reaction mixture. The colloid color changes in visible range from pink to  
172 blue, indicate the formation of hybridized product (Figure 2b-c, and Figure 3). Broadening of the  
173 peak with red-shift (~30 nm) was observed in the spectrum of aggregated colloids than non-  
174 aggregated, confirms the success of developed assay for detection of an unamplified target with  
175 unmodified colloids in a quick and facile way. The principle of binding oligo probe to its specific  
176 target leading to change in color of the solution was independently verified using a different  
177 template RNA (isolated from pancreas tissue) and pancreas specific gene *REG3* oligo probe in  
178 a separate assay. This assay also resulted in a similar change in color and absorption spectra  
179 as optimized earlier for SARS-CoV-2 RNA and *RdRp* oligo probe. It established the working  
180 principle and specificity of the test (Figure S1).

181 We determined the cross-reactivity using a cervical-DNA sample from women diagnosed with  
182 HPV infection (non-specific target control). No color change of gold colloids was observed with  
183 HPV DNA, indicating no hybridization, and specificity of the developed assay (Figure 3 b, right  
184 vial). Contrary to HPV DNA-negative control and NTC, a positive control sample shows  
185 development of blue color (Figure 3 b, middle vial). Absorption spectrum (of colloids) with HPV  
186 DNA-negative control exhibited characteristics similar to that of NTC, and no red-shift or peak  
187 broadening as found with positive samples (Figure 3a). Cross-reactivity of the developed assay  
188 with other respiratory viruses is warranted. However, we do not anticipate the same as the test  
189 utilizes the detection of *the RdRp* gene of the SARS-CoV-2 virus. The oligo probe sequence  
190 used in our assay is not complementary to any human mRNAs and other members of the SARS  
191 family, as verified by BLAST using the NCBI database. (10)



192 IVT synthesized SARS-CoV-2 RNA was used to test the sensitivity of the developed assay.  
193 RNA ranging from 0.1 to 5ng resulted in a gradual change in colloid color from light pink to blue  
194 (Figure 4b). The color difference at 0.1 ng, compared to NTC, is barely visible with naked eyes  
195 (Figure 4 b extreme left vial). However, the absorption spectra of colloids show a clear red-shift  
196 with peak broadening up till 0.5 ng target RNA (Figure 4a).

197 We determined the assay sensitivity using different dilutions (1-0.1ng) of PCR-amplified  
198 synthetic DNA (positive control, with nCoV19 control kit). Similar to IVT synthesized RNA, a  
199 decreasing amount of DNA (from 1 to 0.1 ng) show a gradual change in colloid color from blue  
200 to light pink (left to right, Fig. 4d). A clear red-shift with peak broadening reflects in the  
201 absorption spectra of colloids recorded with control DNA, compared to NTC (Fig. 4c).  
202 Accordingly, positive control showed a clear visual demarcation up to 0.5 ng amount, compared  
203 to NTC (Fig. 4d). A similar recent approach utilizes thiol capped gold nanoparticles to detect N-  
204 gene of the SARS-CoV-2 gene in a cellular system.(9) However, for the detection of SARS-  
205 CoV-2 RNA in human samples, the N-gene has reportedly inferior analytical power than the  
206 *RdRp* gene.(10) Thus, it would be essential to know the assay's performance, developed by  
207 Moitra et al., with clinical samples.

## 208 **Conclusions**

209 We have successfully developed an affordable gold nanoparticles-based colorimetric test for the  
210 rapid detection of SARS-CoV-2 RNA in humans. The assay can detect up to 0.5 ng of SARS-  
211 CoV-2 RNA. The turnaround time of our assay is less than 30 minutes. Moreover, the  
212 developed test will be helpful for mass screening, as it does not require sophisticated  
213 equipment. Validation of the developed assay using a large number of clinical samples is  
214 underway to determine the diagnostic accuracy, including sensitivity, specificity, false-positive  
215 and negative rate.

216 **Acknowledgement**

217 The study was supported by overhead funds from the extramural grants to ST from DBT, ICMR  
218 and MHRD. The authors wish to thank the technical staff of the Department of Microbiology  
219 (SGPGIMS, Lucknow and RMLIMS, Lucknow) for RNA extraction and RT-PCR analysis for the  
220 clinical diagnosis of subjects.

221 **Contributions:** ST, VK; conceived the idea; ST, VK, SM, RS; performed the experiments, JY,  
222 UG; provided clinical samples and the diagnosis; TK, LS and SKV; provided critical comments on  
223 the manuscript draft; ST, VK and SM; drafted the manuscript.

224

225 **Competing Interest**

226 The authors declare no conflict of interest.

227 **Supplementary Files**

228 Supplementary information supporting the finding of this study is available in this article as  
229 supporting information.

230

231 **References-**

232 1. <https://www.who.int/emergencies/diseases/novel-coronavirus-2019?gclid=EAlaIQobChMI-u->

233 [Pz9vW6QIVUyUrCh0kjAIOEAAYASAAEgJ0pvD\\_BwERemuzzi](https://www.who.int/emergencies/diseases/novel-coronavirus-2019?gclid=EAlaIQobChMI-u-Pz9vW6QIVUyUrCh0kjAIOEAAYASAAEgJ0pvD_BwERemuzzi).

234 2. Udugama, B., Kadhiresan, P., Kozlowski, H. N., Malekjahani, A., Osborne, M., Li, V. Y. C., Chen, H.,  
235 Mubareka, S., Gubbay, J. B., and Chan, W. C. W. (2020) Diagnosing COVID-19: The Disease and  
236 Tools for Detection. *ACS Nano* **14**, 3822-3835

237 3. Report of the WHO-China Joint Mission on Coronavirus Disease 2019 (COVID-19); WHO. (2017)

- 238 4. Division of Viral Diseases. CDC 2019-Novel Coronavirus (2019-nCoV) Real-Time RT-PCR  
239 Diagnostic Panel; Division of Viral Diseases, U. S. C. f. D. C. a. P. (2020)
- 240 5. Kashir, J., and Yaqinuddin, A. (2020) Loop mediated isothermal amplification (LAMP) assays as a  
241 rapid diagnostic for COVID-19. *Med Hypotheses* **141**, 109786
- 242 6. Broughton, J. P., Deng, X., Yu, G., Fasching, C. L., Servellita, V., Singh, J., Miao, X., Streithorst, J.  
243 A., Granados, A., Sotomayor-Gonzalez, A., Zorn, K., Gopez, A., Hsu, E., Gu, W., Miller, S., Pan, C.-  
244 Y., Guevara, H., Wadford, D. A., Chen, J. S., and Chiu, C. Y. (2020) CRISPR–Cas12-based detection  
245 of SARS-CoV-2. *Nature Biotechnology*
- 246 7. Qiu, G., Gai, Z., Tao, Y., Schmitt, J., Kullak-Ublick, G. A., and Wang, J. (2020) Dual-Functional  
247 Plasmonic Photothermal Biosensors for Highly Accurate Severe Acute Respiratory Syndrome  
248 Coronavirus 2 Detection. *ACS Nano* **14**, 5268-5277
- 249 8. Chen, Z., Zhang, Z., Zhai, X., Li, Y., Lin, L., Zhao, H., Bian, L., Li, P., Yu, L., Wu, Y., and Lin, G. (2020)  
250 Rapid and Sensitive Detection of anti-SARS-CoV-2 IgG, Using Lanthanide-Doped Nanoparticles-  
251 Based Lateral Flow Immunoassay. *Analytical Chemistry* **92**, 7226-7231
- 252 9. Moitra, P., Alafeef, M., Dighe, K., Frieman, M. B., and Pan, D. (2020) Selective Naked-Eye  
253 Detection of SARS-CoV-2 Mediated by N Gene Targeted Antisense Oligonucleotide Capped  
254 Plasmonic Nanoparticles. *ACS nano*, acsnano.0c03822
- 255 10. Corman, V. M., Landt, O., Kaiser, M., Molenkamp, R., Meijer, A., Chu, D. K., Bleicker, T., Brünink,  
256 S., Schneider, J., Schmidt, M. L., Mulders, D. G., Haagmans, B. L., van der Veer, B., van den Brink,  
257 S., Wijsman, L., Goderski, G., Romette, J.-L., Ellis, J., Zambon, M., Peiris, M., Goossens, H.,  
258 Reusken, C., Koopmans, M. P., and Drosten, C. (2020) Detection of 2019 novel coronavirus  
259 (2019-nCoV) by real-time RT-PCR. *Euro Surveill* **25**, 2000045
- 260 11. Jain, P. K., Lee, K. S., El-Sayed, I. H., and El-Sayed, M. A. (2006) Calculated Absorption and  
261 Scattering Properties of Gold Nanoparticles of Different Size, Shape, and Composition:

262 Applications in Biological Imaging and Biomedicine. *The Journal of Physical Chemistry B* **110**,  
263 7238-7248

264 12. Lazarides, A. A., and Schatz, G. C. (2000) DNA-Linked Metal Nanosphere Materials: Structural  
265 Basis for the Optical Properties. *The Journal of Physical Chemistry B* **104**, 460-467

266 13. Hunter, R. J. F. o. C. S. O. U. P. I. N. Y., 2001. Shaw, D. J. Colloid and Surface Chemistry;  
267 Butterworth-Heinemann Ltd.: Oxford. (1991)

268 14. Grabar, K. C., Freeman, R. G., Hommer, M. B., and Natan, M. J. (1995) Preparation and  
269 Characterization of Au Colloid Monolayers. *Analytical Chemistry* **67**, 735-743

270 15. Li, H., and Rothberg, L. (2004) Colorimetric detection of DNA sequences based on electrostatic  
271 interactions with unmodified gold nanoparticles. *Proceedings of the National Academy of*  
272 *Sciences of the United States of America* **101**, 14036-14039

273

274

275

276

277

278

279

280

281

282

283

284 **Figure 1.**

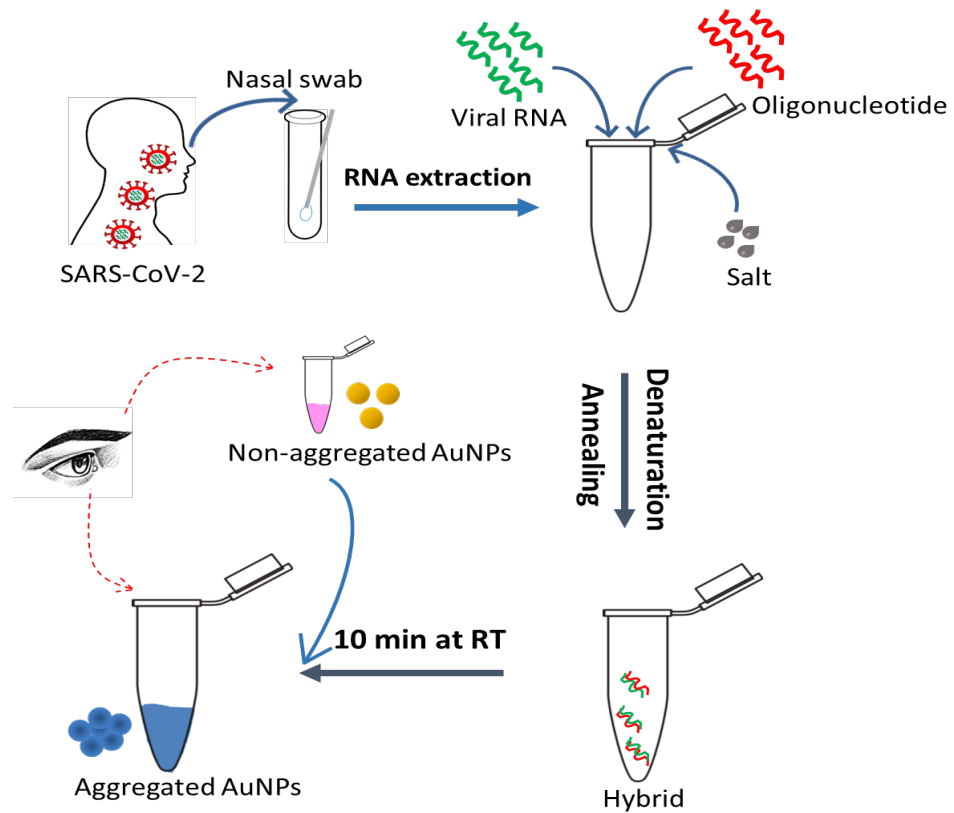

285

**Figure 1. Schematic representation of the assay for the visual detection of SARS-CoV-2 RNA**

Schematic illustrates the assay flow to detect *RdRp* (RNA dependent RNA polymerase) gene sequence of SARS-CoV-2 in the nasopharyngeal RNA sample from subject clinically diagnosed with nCOVID infection (**positive control**). Hybridization buffer with *RdRp* oligo probe (forward) was mixed with RNA sample. The reaction mixture was denatured at 95°C for 30 seconds, followed by annealing at 60° C for 60 seconds. After annealing, the tube was kept at room temperature for 10 minutes before colloidal AuNPs were added. A pure colloid is pink in color. It turns blue in the vial containing RNA sample from **positive control** due to salt-induced aggregation upon successful hybridization between oligo probe and target RNA. The color remained pink in the absence of target RNA, or the presence of a non-specific target.

286 **Figure 2.**

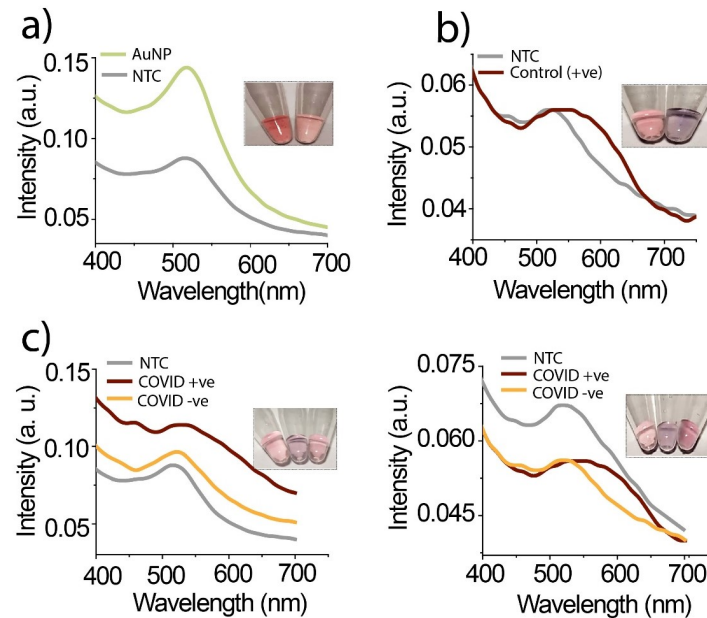

287

**Figure 2. Colorimetric assay to detect SARS-CoV-2 RNA.**

**(a)** Comparative absorption spectra of unmodified AuNPs (Green curve) and oligo probe stabilized AuNPs i.e., NTC (Grey curve). Both spectra are exhibiting characteristics absorption peak at  $\lambda_{max}$  520 nm, however, the reduced peak intensity in NTC is due to dilution of colloid solution. In NTC, no red-shift in peak position, approve the stabilizing property of single-stranded oligo probe, Optical images of gold colloids (left vial) and NTC (right vial) are shown in the inset. **(b)** Comparative absorption spectra of NTC (Grey curve) and positive control i.e., nasopharyngeal RNA sample from subject clinically diagnosed with nCOVID infection (Brown curve). Broadening of the peak as well as red-shift in peak position confirm the salt-induced aggregation of AuNP due to successful hybrid formation in control. Optical images shown in inset demonstrate the evident change in the color of the solution from pink to blue in the control vial (right) while no change in color of NTC vial (left). **(c)** Representative absorption spectra, and in the inset shows optical images comparing assay performed with NTC (Grey curves, left vial), RNA from clinically diagnosed nCOVID infected subjects (Brown curve, middle vial), and RNA from subjects without nCOVID infection (Yellow curve, right vial). Samples from a total of seven infected and six uninfected individuals were analyzed.

288 **Figure 3.**

289

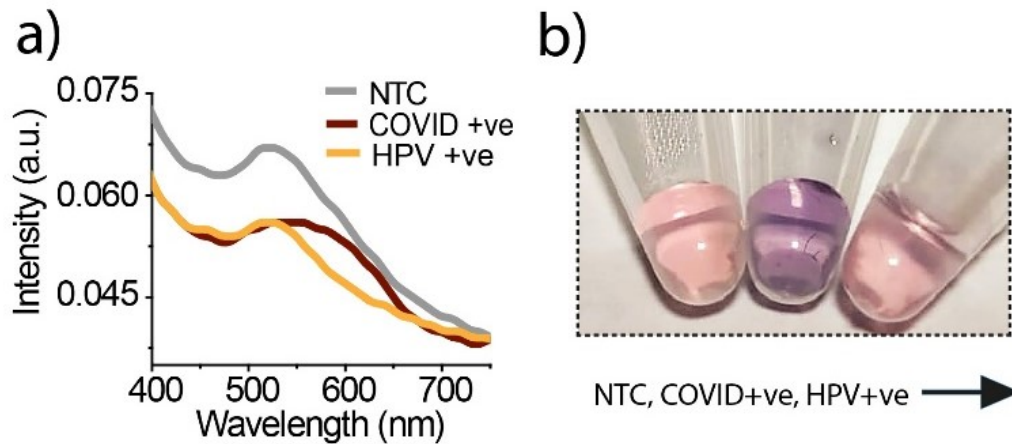

290

291

**Figure 3. Specificity of developed assay to detect SARS-CoV-2 RNA.**

Nasopharyngeal-RNA from nCOVID infected subject (positive control), and a cervical DNA sample from Human papillomavirus (HPV, non-specific target control) infected women were tested. (a) Comparative absorption spectra for no target control (NTC, Grey curve), positive control (Brown curve), and non-specific target control (HPV, Yellow curve). In the positive control, the broadening of the peak and red-shift in peak position (Brown curve) confirmed the salt-induced aggregation upon successful hybrid formation. (b) Optical pictures demonstrate that the colloid color from pink to blue changes only in the vial with the positive control (middle vial), while the color remained pink in the vial with NTC (left vial) or HPV (right vial).

292

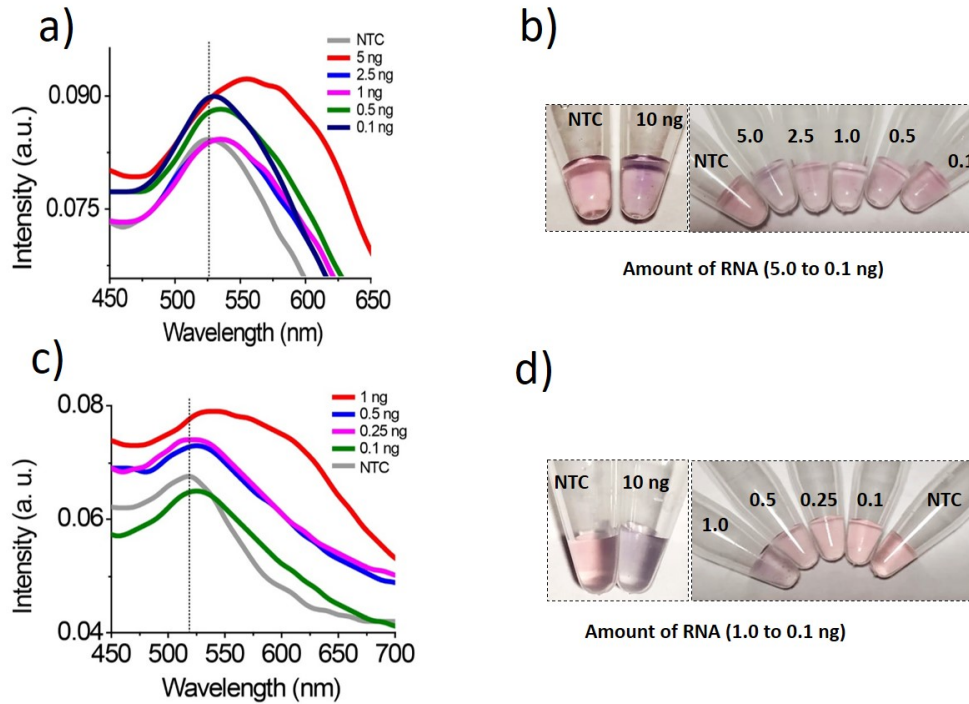

**Figure 4. Sensitivity of developed assay to detect SARS-CoV-2 RNA.**

Assay sensitivity was determined using different concentrations (concentration are in ng) of IVT synthesized SARS-CoV-2 RNA (a-b), or nCOVID synthetic DNA (c-d). Absorption spectra (a and c) corresponding to aggregated colloids exhibit a clear red-shift in peak with broadening, indicating successful hybridization. Optical pictures (b & d) of the assay performed to demonstrate the color change, an extra pair of vials (on the left) to show color change with a higher amount (10ng) of target nucleic acid for the reference



297 **Supporting information**

298 **Development of RNA-based visual assay for rapid detection of SARS-CoV-2**  
299 **in clinical samples**

300 <sup>1#</sup> Vinod Kumar, <sup>1#</sup> Suman Mishra, <sup>1#</sup> Rajni Sharma, <sup>2</sup> Jyotsna Aggarwal, <sup>3</sup> Ujjala Ghoshal, <sup>4</sup> Tripti  
301 Khanna, <sup>1</sup> Lokendra K. Sharma, <sup>1</sup> Santosh Kumar Verma and <sup>1</sup> Swasti Tiwari

302 <sup>1</sup>Department of Molecular Medicine & Biotechnology, SGPGIMS, Raibareli Road, Lucknow -  
303 226014, India; <sup>2</sup> Department of Microbiology, Dr. Ram Manohar Lohia Institute of Medical  
304 Sciences, Lucknow, 226010; <sup>3</sup>Department of Microbiology, Virology and COVID19 Lab,  
305 SGPGIMS, Raibareli Road, Lucknow -226014, India; <sup>4</sup>Indian Council of Medical Research,  
306 Ramalingaswami Bhawan, New Delhi, India

307

308

309 **Figure S1**

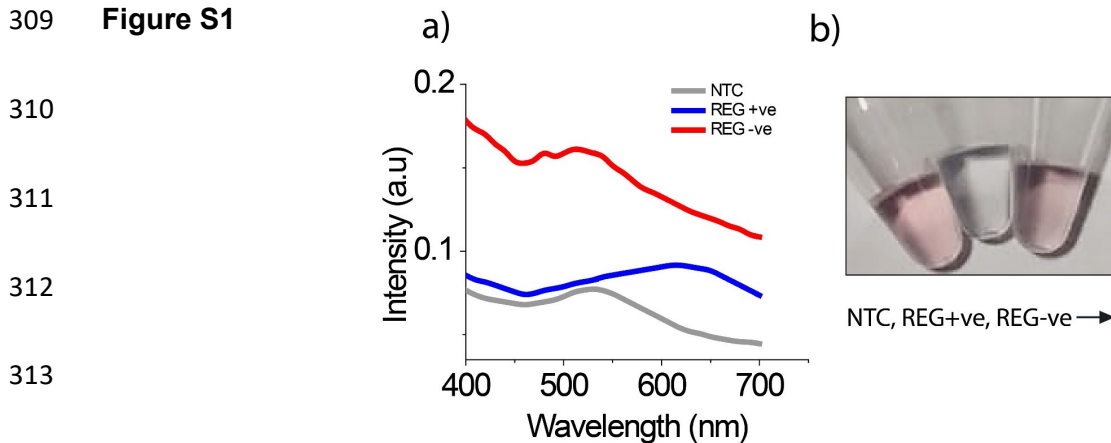

**Figure S1.** The assay was performed using an oligo probe specific for regenerating islet-derived (REG 3). The assay was containing RNA extracted from pancreatic tissue (positive control), placental RNA (negative control), or no RNA (NTC). **(a)** Comparative absorption spectra of NTC (Grey curve), positive control (Blue curve), and negative control (red curve). In the positive control, the broadening of the peak and red-shift in peak position (Blue curve) confirm the salt-induced aggregation upon successful hybrid formation. **(b)** Optical pictures demonstrate that the colloid color from pink to blue changes only in the vial with the positive control (middle vial), while the color remained pink in the vial with NTC (left vial) or negative control (non-specific target, right vial).

314 **Table S1**

315

316

317

318

319

320

321

322

323

324

325

326

| <b>Patient ID</b> | <b>Age in Years (Y)/ Gender</b> | <b>nCOVID19 infection</b> | <b>E gene Ct value</b> | <b>RdRp Ct Value</b> |
|-------------------|---------------------------------|---------------------------|------------------------|----------------------|
| <b>S1</b>         | 18 Y / male                     | <b>Positive</b>           | 25.45                  | 25.30                |
| <b>S2</b>         | 18Y / male                      | <b>Positive</b>           | 28.37                  | 29.20                |
| <b>S3</b>         | 11 Y /female                    | Negative                  | -                      | -                    |
| <b>R1</b>         | <b>1 Y/Female</b>               | <b>Positive</b>           | 22.66                  | 21.20                |
| <b>R2</b>         | 28 Y/Female                     | Negative                  | -                      | -                    |
| <b>R3</b>         | 35 Y/Male                       | Negative                  | -                      | -                    |
| <b>R4</b>         | <b>66 Y/Female</b>              | <b>Positive</b>           | 22.81                  | 24.59                |
| <b>R5</b>         | <b>18 Y/Male</b>                | <b>Positive</b>           | 23.16                  | 22.66                |
| <b>R6</b>         | 14 Y/Male                       | Negative                  | -                      | -                    |
| <b>R7</b>         | 70 Y/Female                     | Negative                  | -                      | -                    |
| <b>R8</b>         | <b>44 Y/Male</b>                | <b>Positive</b>           | 29.64                  | 25.56                |
| <b>R9</b>         | 35Y /Male                       | Negative                  | -                      | -                    |
| <b>R10</b>        | <b>9 Y/Female</b>               | <b>Positive</b>           | 28.69                  | 29.70                |

**Table S1.** The table shows the clinical diagnosis of the subjects based on Taqman RT-PCR analysis.

RNA extracted from the nasopharyngeal samples were analyzed in the study.

327

328
